# Supplementary material for: A Fast-Response AIE-Active Ratiometric Fluorescent Probe for the Detection of Carboxylesterase
Source: MDPI journal article supplement (doi:10.3390/bios12070484), 2022-07-03
Supplement: s1 [file s1]

# A Fast-Response AIE-Active Ratiometric Fluorescent Probe for the Detection of Carboxylesterase

Mengting Xia <sup>1,2,†</sup>, Chunbin Li <sup>2,†</sup>, Lingxiu Liu <sup>2</sup>, Yumao He <sup>2</sup>, Yongdong Li <sup>1</sup>, Guoyu Jiang <sup>2</sup> and Jianguo Wang <sup>2,\*</sup>

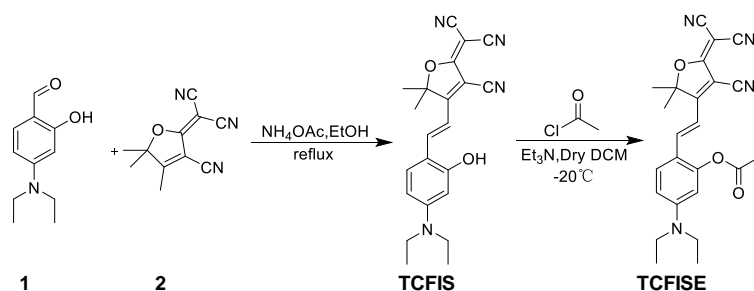

**Scheme S1.** Synthetic route to TCFIS and TCFISE.

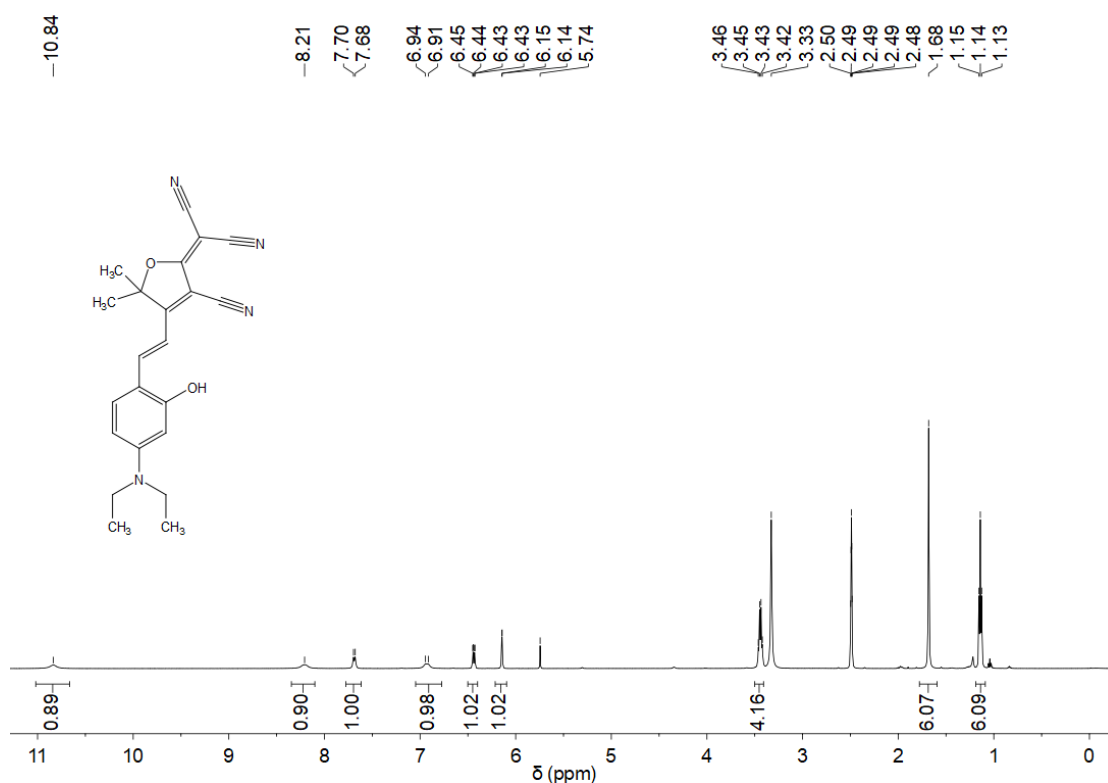

**Figure S1.** <sup>1</sup>H NMR spectrum of TCFIS in DMSO-*d*<sub>6</sub>.



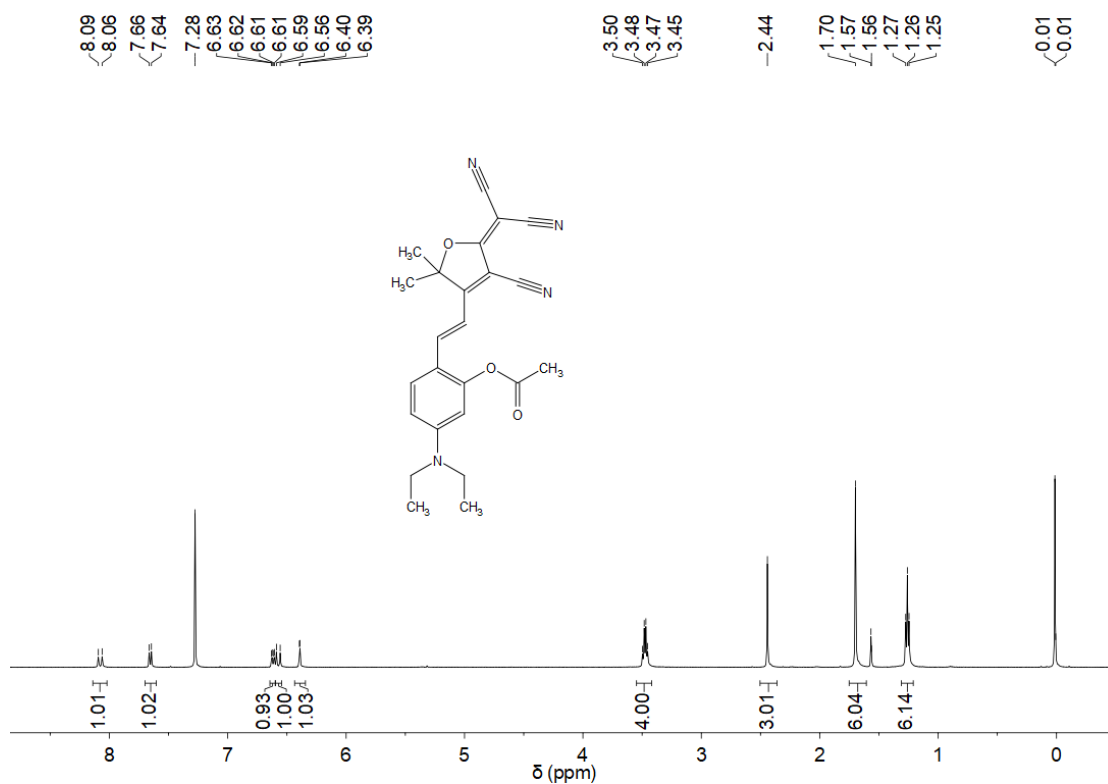

Figure S4. <sup>1</sup>H NMR spectrum of TCFISE in CDCl<sub>3</sub>.

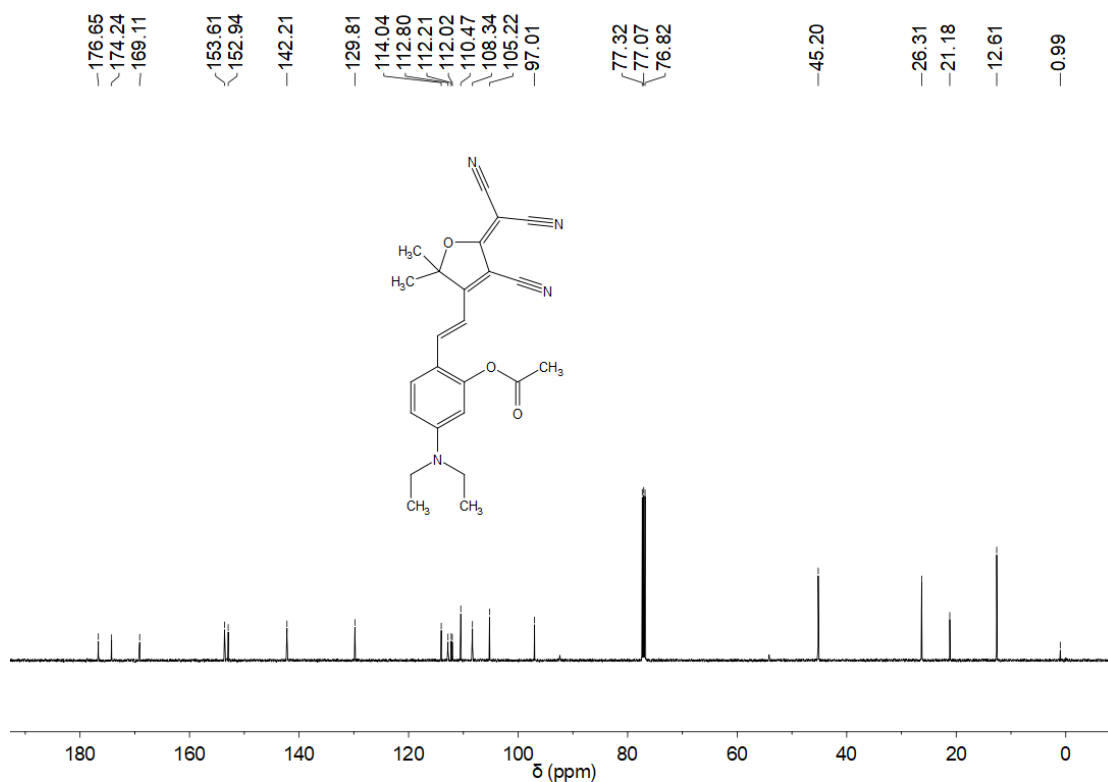

Figure S5. <sup>13</sup>C NMR spectrum of TCFISE in CDCl<sub>3</sub>.

## Single Mass Analysis

Tolerance = 5.0 PPM / DBE: min = -1.5, max = 50.0

Element prediction: Off

Number of isotope peaks used for i-FIT = 3

Monoisotopic Mass, Even Electron Ions

47 formula(e) evaluated with 1 results within limits (up to 50 best isotopic matches for each mass)

Elements Used:

C: 1-27 H: 0-50 N: 1-4 O: 1-4

S

1206-5-xmt-2 131 (0.744)

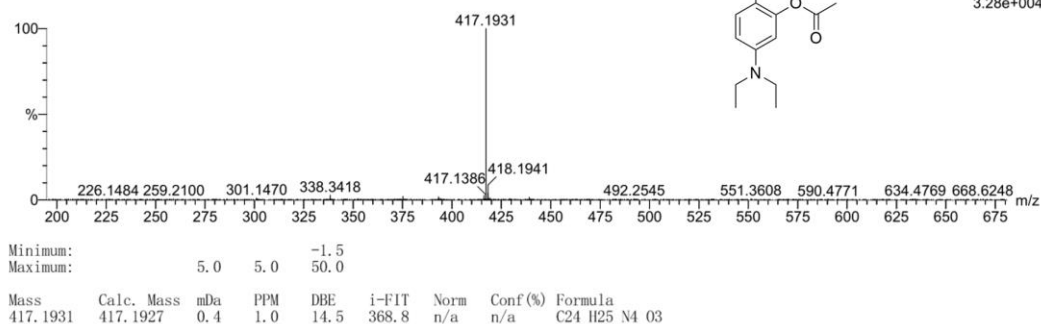

Figure S6. HRMS spectrum of TCFISE.

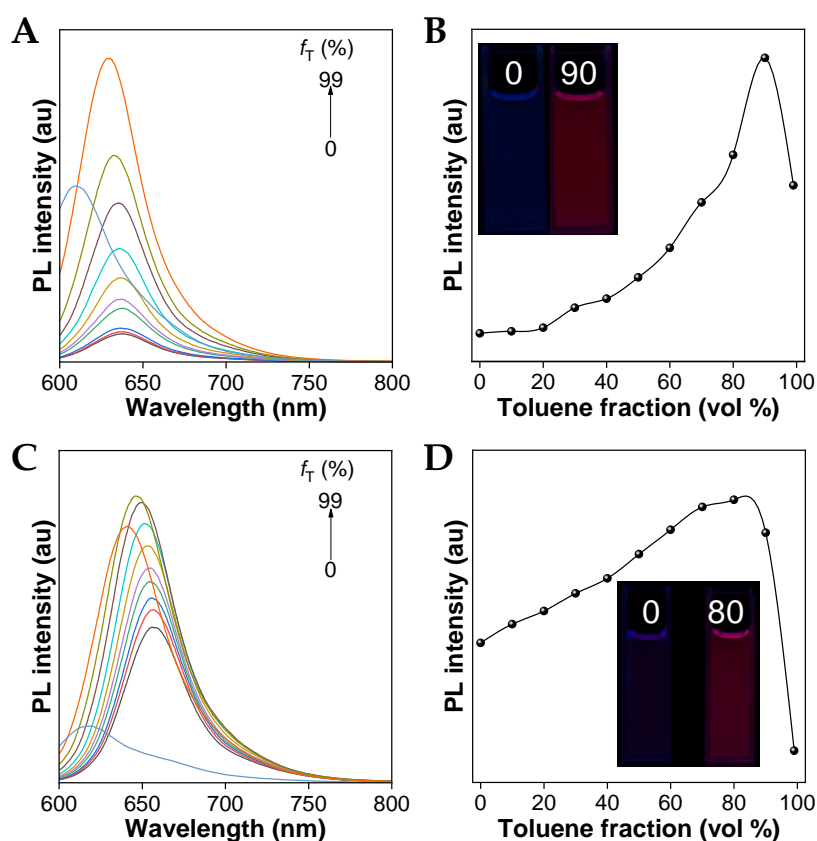

**Figure S7.** (A) PL spectra of TCFIS (5  $\mu$ M) in toluene/DMSO mixed solution with different toluene fractions ( $f_T$ ). (B) Plot of PL intensity of TCFIS (5  $\mu$ M) at maximum emission wavelength versus the toluene fraction in the toluene/DMSO mixtures. (C) PL spectra of TCFISE (5  $\mu$ M) in toluene/DMSO mixed solution with different toluene fractions ( $f_T$ ). (D) Plot of PL intensity of TCFISE (5  $\mu$ M) at maximum emission wavelength versus the toluene fraction in the toluene/DMSO mixtures.  $\lambda_{ex}$ =575 nm.

## Single Mass Analysis

Tolerance = 5.0 PPM / DBE: min = -1.5, max = 50.0

Element prediction: Off

Number of isotope peaks used for i-FIT = 3

Monoisotopic Mass, Even Electron Ions

52 formula(e) evaluated with 1 results within limits (up to 50 best isotopic matches for each mass)

Elements Used:

C: 1-22 H: 0-70 N: 1-4 O: 1-5

S

1206-5-xmt-6 68 (0.398) QT (2)

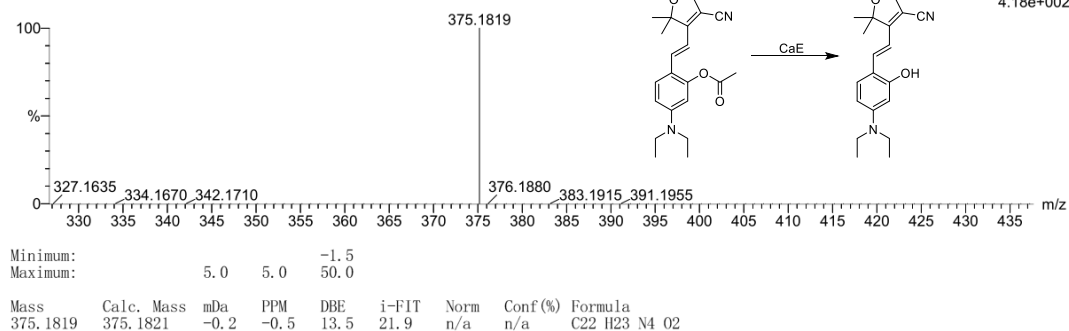

Figure S8. HRMS spectrum of TCFISE after incubation with CaE (1 U/mL) at 37 °C for 20 min.

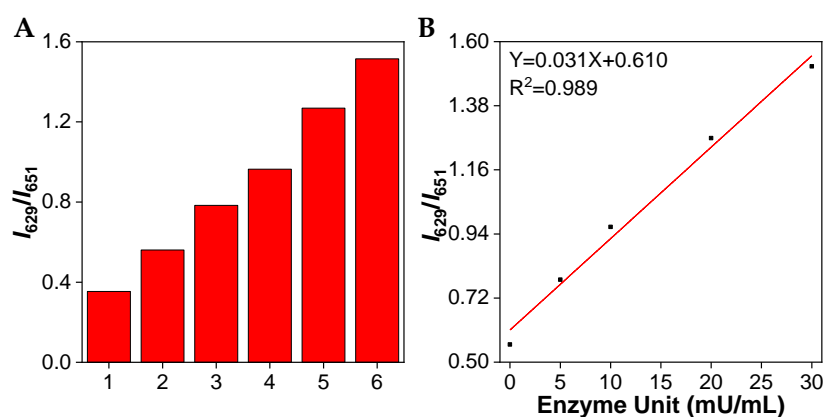

**Figure S9.** (A) Variation of the relative PL intensity ratios ( $I_{629}/I_{651}$ ) of TCFISE in 20-fold diluted serum samples. 1: TCFISE only; 2-6: TCFISE + serum samples + CaE (0, 5, 10, 20, and 30 mU/mL). (B) Plot and linear fitting of relative PL intensity ratios ( $I_{629}/I_{651}$ ) of TCFISE in 20-fold diluted serum samples vs the concentration of spiked CaE (0-30 mU/mL).  $\lambda_{ex}=575$  nm.

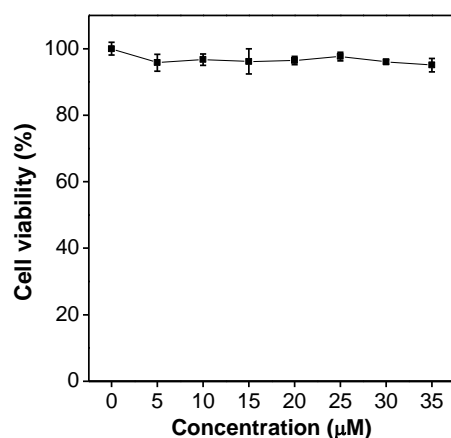

Figure S10. Cell viability of TCFISE toward HeLa cell by using MTT assays.

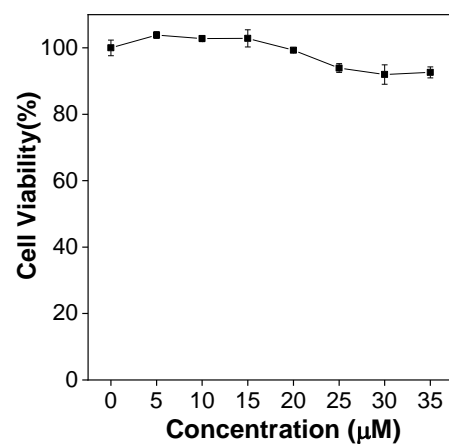

**Figure S11.** Cell viability of TCFISE toward HepG2 cell by using MTT assays.

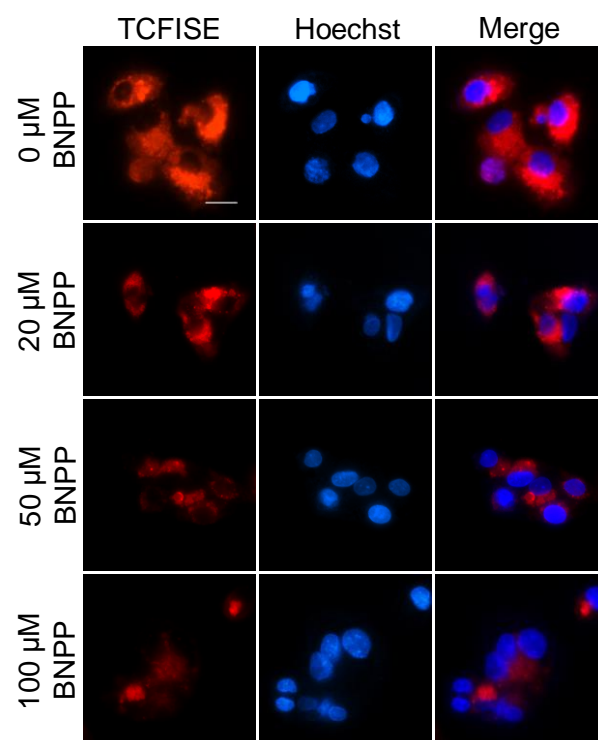

**Figure S12.** HepG2 cell imaging of TCFISE (5 μM) in the presence of different concentrations of BNPP. Commercial available Hoechst (1 μM) was used for the indication of nucleus. Scale bar: 20 μm.

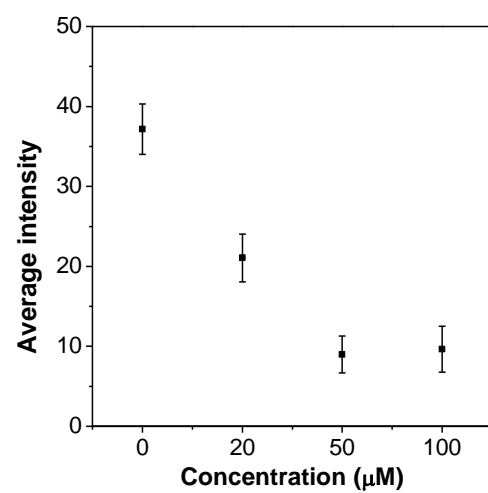

**Figure S13.** The average intensity of TCFISE channel in the presence of different concentrations of BNPP in Figure S12.
